# Supplementary material
Source: PubMed Central journal article supplement (PMC6075214)
Supplement: murty_cc_si.pdf [file murty_cc_si.pdf]

Hippocampus and prefrontal cortex predict distinct timescales of activation in human ventral tegmental area.

Vishnu P. Murty, Ian C. Ballard, R. Alison Adcock

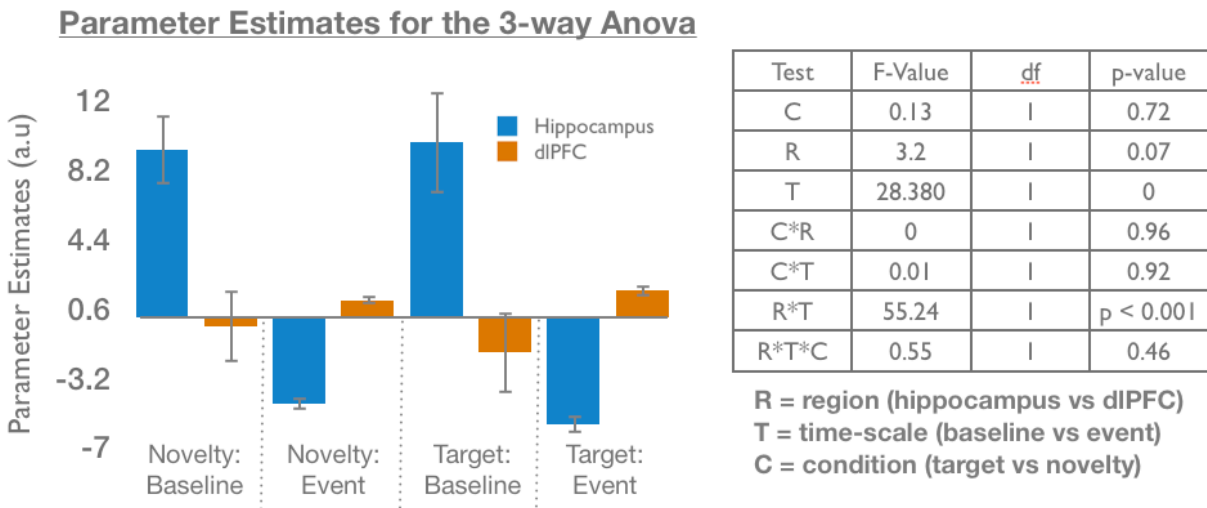

Supplemental Figure 1: Influence of condition on interactions of the DLPFC and hippocampus with the VTA. We performed a repeated-measures ANOVA to test whether DLPFC and hippocampal influences on the VTA, both event and baseline, were influenced by condition type. We did not see a significant 3-way interaction of afferent region (dlpfc, hippocampus), VTA response (baseline, event), and condition (target, novelty).
